# Supplementary material for: Pleistocene drivers of Northwest African hydroclimate and vegetation
Source: PubMed Central journal article supplement (PMC9213457; doi:10.1038/s41467-022-31120-x), 2022-06-21
Supplement: 41467_2022_31120_MOESM3_ESM.pdf [file 41467_2022_31120_MOESM3_ESM.pdf]

## Description of Additional Supplementary Files

Filename: Supplementary Data 1

Description: Age model tie points for MD03-2705 based on  $\delta^{18}\text{O}$  stratigraphy and magnetic reversal ages

Filename: Supplementary Data 2

Description: MD03-2705 alkane concentrations and isotopic compositions

Filename: Supplementary Data 3

Description: MD03-2705 helium isotopic compositions and dust fluxes

Filename: Supplementary Data 4

Description: MD03-2705 helium and thorium normalization comparison data
